# Supplementary material
Source: publisher figshare collection journal article supplement (https://future-science-group.figshare.com/articles/dataset/_/24137907)
Supplement: Supplementary file 1 [file 1]

|  | **EU5 (n=2,179)** | | **France**  **(n=483)** | **Germany**  **(n=421)** | **Italy**  **(n=449)** | **Spain**  **(n=411)** | **UK (n=415)** |
| --- | --- | --- | --- | --- | --- | --- | --- |
| **Age, years** | | | | | | | |
| Mean (SD) | 70.3 (9.36) | | 72.1 (9.07) | 70 (6.67) | 68.6 (11.07) | 70.6 (10.18) | 70.1 (8.78) |
| Median (IQR) | 72.0 (65.0, 77.0) | | 74 (68.0, 78.0) | 71 (67.0, 74.0) | 70 (63.0, 77.0) | 72 (65.0, 78.0) | 72 (64.0, 77.0) |
| **P-values (country vs. EU4)** | | | <0.0001* (TT) | 0.4273 (TT) | <0.0001* (TT) | 0.4709 (TT) | 0.6534 (TT) |
| **Sex, n (%)** | | | | | | | |
| Male | 1,255 (58) | | 253 (52) | 261 (62) | 260 (58) | 229 (56) | 61 (39) |
| Female | 924 (42) | | 230 (48) | 160 (38) | 189 (42) | 182 (44) | 163 (39) |
| **P-values (country vs. EU4)** | | | 0.0086* (CH) | 0.0420* (CH) | 0.8809 (CH) | 0.3925 (CH) | 0.1519 (CH) |
| **Ethnicity, n (%)** | | | | | | | |
| White | 2,025 (93) | | 428 (89) | 415 (99) | 438 (98) | 394 (96) | 350 (84) |
| Asian (Indian subcontinent) | 19 (1) | | 1 (<1) | 0 (0) | 0 (0) | 0 (0) | 18 (4) |
| Asian (other) | 2 (<1) | | 1 (<1) | 0 (0) | 0 (0) | 0 (0) | 1 (<1) |
| Hispanic / Latino | 38 (2) | | 13 (3) | 0 (0) | 8 (2) | 14 (3) | 3 (1) |
| Middle Eastern | 14 (1) | | 11 (2) | 2 (<1) | 0 (0) | 0 (0) | 1 (<1) |
| Mixed race | 7 (<1) | | 2 (<1) | 3 (1) | 1 (<1) | 0 (0) | 1 (<1) |
| Afro-Caribbean | 57 (3) | | 21 (4) | 1 (<1) | 1 (<1) | 1 (<1) | 33 (8) |
| South-East Asian | 14 (1) | | 4 (1) | 0 (0) | 1 (<1) | 1 (<1) | 8 (2) |
| Other | 3 (<1) | | 2 (<1) | 0 (0) | 0 (0) | 1 (<1) | 0 (0) |
| **P-values (country vs. EU4)** | | | <0.0001* (CH) | <0.0001* (CH) | 0.0014* (CH) | 0.0002* (CH) | <0.0001* (CH) |
| **Employment status, n (%)** | | | | | | | |
| Working full-time | 166 (8) | | 26 (5) | 7 (2) | 87 (19) | 25 (6) | 21 (5) |
| Working part-time | 73 (3) | | 11 (2) | 4 (1) | 13 (3) | 14 (3) | 31 (7) |
| Unemployed | 59 (3) | | 19 (4) | 5 (1) | 11 (2) | 9 (2) | 15 (4) |
| On long-term sick leave | 126 (6) | | 28 (6) | 25 (6) | 25 (6) | 36 (9) | 12 (3) |
| Retired | 1,597 (73) | | 375 (78) | 359 (85) | 273 (61) | 279 (68) | 311 (75) |
| Homemaker | 152 (7) | | 24 (5) | 21 (5) | 39 (9) | 44 (11) | 24 (6) |
| Furloughed/Government work scheme | 6 (0) | | 0 (0) | 0 (0) | 1 (0) | 4 (1) | 1 (0) |
| **P-values (country vs. EU4)** | | | 0.0111* (CH) | <0.0001* (CH) | <0.0001* (CH) | <0.0001* (CH) | <0.0001* (CH) |
| **On long-term sick leave/retired/unemployed due to their MM, n (%)** | | | | | | | |
|  | **n=1,696** | | **n=409** | **n=385** | **n=281** | **n=299** | **n=322** |
| Yes | 216 (13) | | 39 (10) | 48 (13) | 39 (14) | 64 (21) | 26 (8) |
| No | 1,480 (87) | | 370 (90) | 337 (88) | 242 (86) | 235 (79) | 296 (92) |
| **P-values (country vs. EU4)** | | | 0.0258** (CH) | 0.8574 (CH) | 0.5291 (CH) | <0.0001** (CH) | 0.0053** (CH) |
| **Retired due to MM, n (%)** | | | | | | | |
|  | **n=1,516** | | **n=362** | **n=246** | **n=246** | **n=256** | **n=296** |
| Yes | 83 (5) | | 10 (3) | 20 (6) | 12 (5) | 28 (11) | 13 (4) |
| No | 1,433 (95) | | 352 (97) | 336 (94) | 234 (95) | 228 (89) | 283 (96) |
| **P-values (country vs. EU4)** | | | 0.0093* (CH) | 0.8921 (CH) | 0.653 (CH) | <0.0001* (CH) | 0.3612 (CH) |
| **Average number of previous lines received** | | |  |  |  |  |  |
|  | **n=1,778** | | **n=377** | **n=339** | **n=388** | **n=333** | **n=341** |
| Mean (SD) | 2.1 (0.9) | | 2 (0.9) | 2.1 (0.8) | 2 (1.0) | 2.2 (1.0) | 2.3 (0.9) |
| Median (IQR) | 2.0 (1.0, 3.0) | | 2.0 (1.0, 3.0) | 2.0 (2.0, 3.0) | 2.0 (1.0, 3.0) | 2.0 (1.0, 3.0) | 2.0 (2.0, 3.0) |
| **P-values (country vs. EU4)** | | | 0.0003* (TT) | 0.7748 (TT) | 0.033* (TT) | 0.0454* (TT) | 0.0002* (TT) |
| **Current LOT, n (%)** | **n=2,179** | | **n=483** | **n=421** | **n=449** | **n=411** | **n=415** |
| 1 | 401 (18) | | 106 (22) | 82 (19) | 61 (14) | 78 (19) | 74 (18) |
| 2 | 508 (23) | | 141 (29) | 70 (17) | 138 (31) | 87 (21) | 72 (17) |
| 3 | 637 (29) | | 124 (26) | 157 (37) | 119 (27) | 114 (28) | 123 (30) |
| 4 | 555 (25) | | 96 (20) | 108 (26) | 115 (26) | 112 (27) | 124 (30) |
| 5+ | 78 (4) | | 16 (31) | 4 (1) | 16 (4) | 20 (5) | 22 (5) |
| **P-values (country vs. EU4)** | | | <0.0001* (KW) | 0.8709 (KW) | 0.7645 (KW) | 0.2891 (KW) | 0.0023* (KW) |
| Mean (SD) | 2.7 (1.2) | | 2.5 (1.2) | 2.7 (1.1) | 2.8 (1.1) | 2.8 (1.2) | 2.9 (1.2) |
| Median (IQR) | 3.0 (2.0, 4.0) | | 2.0 (2.0, 3.0) | 3.0 (2.0, 4.0) | 3.0 (2.0, 4.0) | 3.0 (2.0, 4.0) | 3.0 (2.0, 4.0) |
| **P-values (country vs. EU4)** | | | <0.0001* (TT) | 0.8058 (TT) | 0.5842 (TT) | 0.2397 (TT) | 0.0043* (TT) |
| **ISS stage of MM at time of data collection, n (%)** | | | | | | | |
|  | **n=1,903** | | **n=445** | **n=393** | **n=398** | **n=342** | **n=325** |
| Stage I | 225 (12) | | 24 (5) | 52 (13) | 54 (14) | 56 (16) | 39 (12) |
| Stage II | 517 (27) | | 79 (18) | 157 (40) | 90 (23) | 114 (33) | 77 (24) |
| Stage III | 1161 (61) | | 342 (77) | 184 (47) | 254 (64) | 172 (50) | 209 (64) |
| **P-values (country vs. EU4)** | | | 0.0001* (MW) | 0.0001* (MW) | 0.4204 (MW) | 0.0001* (MW) | 0.2613 (MW) |
| **ECOG scores at data collection, n (%)** | | | | | | | |
|  | **n=2,177** | | **n=483** | **n=421** | **n=448** | **n=410** | **n=415** |
| 0-1 | 1,539 (71) | | 361 (75) | 257 (61) | 295 (66) | 294 (72) | 332 (80) |
| 2+ | 638 (29) | | 122 (25) | 164 (39) | 153 (34) | 116 (28) | 83 (20) |
| Mean (SD) | 1.2 (0.8) | | 1.2 (0.8) | 1.4 (0.7) | 1.3 (0.9) | 1.1 (0.9) | 0.9 (0.7) |
| Median (IQR) | 1 (1.0, 2.0) | | 1 (1.0, 2.0) | 1 (1.0, 2.0) | 1 (1.0, 2.0) | 1 (1.0, 2.0) | 1 (0.0, 1.0) |
| **P-values (country vs. EU4)** | | | 0.0268 (MW) | <0.0001* (MW) | 0.1115 (MW) | 0.6168 (MW) | <0.0001* (MW) |
| **Time since diagnosis, months** |  | |  |  |  |  |  |
|  | **n=2,037** | | **n=462** | **n=420** | **n=410** | **n=378** | **n=367** |
| Mean (SD) | 48.0 (38.38) | | 45.6 (37.3) | 35.3 (26.86) | 52.9 (39.53) | 57.8 (46.07) | 50.2 (36.84) |
| Median (IQR) | 41.9 (19.4, 67.2) | | 40.3 (13.0, 66.1) | 31.8 (17.9, 45.0) | 45.9 (22.9, 76.6) | 50.0 (23.2, 85.7) | 50.2 (20.8, 68.4) |
| **P-values (country vs. EU4)** | | | 0.1235 (TT) | <0.0001 (TT) | 0.0038* (TT) | <0. 0001* (TT) | 0.2364 (TT) |
| **Cytogenetic riska, n (%)** | | | | | | | |
|  | **n=623** | | **n=172** | **n=76** | **n=132** | **n=152** | **n=91** |
| High risk | 244 (39) | | 71 (41) | 46 (61) | 42 (32) | 56 (37) | 29 (32) |
| Intermediate risk | 125 (20) | | 38 (22) | 12 (16) | 25 (19) | 33 (22) | 17 (19) |
| Low risk | 84 (13) | | 25 (15) | 2 (3) | 21 (16) | 23 (15) | 13 (14) |
| Inconclusive risk | 170 (27) | | 38 (22) | 16 (21) | 44 (33) | 40 (26) | 32 (35) |
| **P-values (country vs. EU4)** | | | 0.183 (MW) | 0.0004* (MW) | 0.0233* (MW) | 0.7561 (MW) | 0.0503 (MW) |
| **Tri-exposed, n (%)** | |  |  |  |  |  |  |
|  | | **n=2,179** | **n=483** | **n=421** | **n=449** | **n=411** | **n=415** |
| Tri-exposed | | 547 (25) | 117 (24) | 108 (26) | 132 (29) | 100 (24) | 90 (22) |
| Non-tri-exposed | | 1,632 (75) | 366 (76) | 313 (74) | 317 (71) | 311 (76) | 325 (78) |
| **P-values (country vs. EU4)** | | | 0.6133 (CH) | 0.772 (CH) | 0.0185* (CH) | 0.6885 (CH) | 0.0744 (CH) |
| **Tri-refractoryb, n (%)** | |  |  |  |  |  |  |
|  | | **n=539** | **n=116** | **n=107** | **n=130** | **n=98** | **n=88** |
| Tri-refractory | | 226 (42) | 48 (41) | 44 (41) | 59 (45) | 39 (40) | 36 (41) |
| Non-tri-refractory | | 313 (58) | 68 (59) | 63 (59) | 71 (55) | 59 (60) | 52 (59) |
| **P-values (country vs. EU4)** | | | 0.8922 (CH) | 0.8499 (CH) | 0.3594 (CH) | 0.6361 (CH) | 0.8321 (CH) |
